## Arthropod Diversity and Conservation in Old-Growth Northwest Forests<sup>1</sup>

JOHN D. LATTIN

Systematic Entomology Laboratory, Department of Entomology, Oregon State University,  
Corvallis, Oregon 97331-2907

**SYNOPSIS.** Old-growth forests of the Pacific Northwest extend along the coastal region from southern Alaska to northern California and are composed largely of conifer rather than hardwood tree species. Many of these trees achieve great age (500–1,000 yr). Natural succession that follows forest stand destruction normally takes over 100 years to reach the young mature forest stage. This succession may continue on into old-growth for centuries. The changing structural complexity of the forest over time, combined with the many different plant species that characterize succession, results in an array of arthropod habitats. It is estimated that 6,000 arthropod species may be found in such forests—over 3,400 different species are known from a single 6,400 ha site in Oregon. Our knowledge of these species is still rudimentary and much additional work is needed throughout this vast region. Many of these species play critical roles in the dynamics of forest ecosystems. They are important in nutrient cycling, as herbivores, as natural predators and parasites of other arthropod species. This faunal diversity reflects the diversity of the environment and the arthropod complex provides a sensitive barometer of the conditions of the forest. Conservation efforts for forest arthropods are limited at present and controlled largely by land-use policies. For example, an effort is being made to include arthropods in conservation efforts for the Northern Spotted Owl and arthropods will be included in the Forest Health Monitoring program now underway by the U.S. Forest Service. Evidence from other parts of the world suggest that arthropods that depend upon large pieces of dead wood may be particularly threatened by forest management practices. Much remains to be done in the conservation of forest arthropods.

### INTRODUCTION

The old-growth forests of the Pacific Northwest form a distinctive biotic region that extends along the Pacific Coast from southeast Alaska to northern California. Waring and Franklin (1979) characterized these forests as unique in their size and in the longevity of the individuals of the dominant tree species, resulting in very large accumulations of biomass. The 25 dominant tree species are conifers rather than hardwoods although there are hardwood taxa found in the forests (e.g., *Acer* L., *Alnus* Mill., *Castanopsis* (D. Don) Spach, *Litho-*

*carpus* Blume, *Populus* L., *Quercus* L., and *Salix* L.) (Franklin and Dyrness, 1971). The large trees develop extensive canopies characterized more by their height than breadth.

These conifer species achieve great age. Many of the oldest individuals of each species are found in these forests (e.g., Sitka spruce [*Picea sitchensis* (Bong.) Carr.] > 500 yr, Douglas-fir [*Pseudotsuga menziesii* (Mirb.) Franco] > 750 yr, Alaska yellow-cedar [*Chamaecyparis nootkatensis* (D. Don) Spach] > 1,000 yr, western red cedar [*Thuja plicata* Donn ex D. Don] > 1,000 yr, coast redwood [*Sequoia sempervirens* (D. Don) Endl.] > 1,250 yr) (Waring and Franklin, 1979). Other related attributes of the forests are the presence of massive amounts of coarse woody debris (CWD) as snags or on the ground (Maser and Trappe, 1984; Harmon *et al.*, 1986; Maser *et al.*, 1988; Har-

<sup>1</sup> From the Symposium *The Crisis in Invertebrate Conservation* presented at the Annual Meeting of the American Society of Zoologists and the Canadian Society of Zoologists, 27–30 December 1992, at Vancouver, British Columbia.

mon *et al.*, 1990; Harmon, 1992) and a deep, complex litter layer (Franklin and Dyrness, 1973; Lattin, 1990; Moldenke, 1990). These and other features contribute to the structural diversity of the forests—diversity that is reflected by the diversity of arthropods found there (Lawton, 1983; Asquith *et al.*, 1990; Parsons *et al.*, 1991).

While these old forests have great stability over time and space, the forests are the product of several centuries of change through succession following disturbance (Lattin, 1990). Fire and wind, besides insects and diseases, are the main natural disturbances. The prolonged succession results in a continually changing mosaic of environments and habitats available to arthropods (Southwood, 1977; Southwood *et al.*, 1979; Lawton, 1983). Over 3,400 species of arthropods have been documented from one old-growth site, the H. J. Andrews Experimental Forest (HJA). This site is a 6,400 ha old-growth Douglas-fir forest in the Willamette National Forest east of Eugene, Oregon. The HJA was established in 1948 by the U.S. Forest Service to examine the consequences of long-term habitat manipulation. It was a major component of the western Coniferous Forest Biome during the International Biological Programme in the 1960s, was named an Experimental Ecological Reserve in the 1970s, and became one of the first National Science Foundation funded, Long-Term Ecological Research Sites in 1980. Today, over 50 scientists work on the site and conduct a variety of investigations related to forest ecosystems. Included in these and past investigations are many involving arthropods. This accumulated information provides the basis for this paper.

#### ARTHROPODS OF OLD-GROWTH FORESTS

Insects were first collected in the Pacific Northwest between 1834 and 1836 by Dr. John Kirk Townsend, an ornithologist from Philadelphia (Hatch, 1949). Remarkably, he collected specimens of a typical old-growth forest insect, the beetle, *Omus dejeani*, described by the French coleopterist, Louis Reiche, in 1838. This is a flightless, nocturnal tiger beetle. A second species of *Omus*, collected during the same period

also was described by Reiche. These were the first insects to be recorded in the scientific literature from the Pacific Northwest (Hatch, 1949).

Other collectors came to the region in the years that followed. M. H. Hatch (1949) provided an interesting account of the history of entomology in the Pacific Northwest. One collector/sportsman was Lord Walsingham from England who traveled through Oregon and California in 1871 and 1872 collecting moths while on a hunting expedition. This trip resulted in a slim volume on the plume moths of California and Oregon, complete with colored plates of most species (Walsingham, 1880). At the time, European specialists wrote most of the scientific literature based upon these early collections. As the area became populated and institutions established, there was a gradual accumulation of knowledge on the arthropods of the region. The number of species involved, and the relatively few scientists present, made progress slow. Even today, the problem of numbers of species and the shortage of specialists continues. There are still many taxa largely unstudied and unknown (Stanton and Lattin, 1989). By way of example, the collection of the Systematic Entomology Laboratory, Department of Entomology, Oregon State University, was initiated over 100 years ago. Today, the collection contains over 2,500,000 specimens with heavy emphasis on the Pacific Northwest. It contains thousands of unstudied specimens because there are no specialists for many groups.

Our knowledge of insects in forest ecosystems grew in several ways. As interest in these productive forests increased, there was increased interest in the arthropods of the forests, chiefly insects. Emphasis was on those species that were considered pests for one reason or another. Eventually this knowledge was synthesized by Keen (1952) and, more recently, by Furniss and Carolin (1977). The latter volume contains a vast amount of information on western forest insects, including many that occur beyond the region considered here. Central to the acquisition of such information were the Canadian and United States government-based forest services. Other major sources

of information were the many taxonomic revisions of major taxa found in forests (*e.g.*, wood boring beetles, sawflies, loopers, and spiders). These studies provided the backdrop to studies focussing upon arthropods found in old-growth forests in western North America. Without the previous work of literally hundreds of individuals, studies on old-growth forests would have been extremely difficult or impossible.

#### *The international biological programme*

The International Biological Programme (IBP), started in the 1960s, increased interest in ecosystem structure and function. One sub-unit of the IBP in North America was the Western Coniferous Biome. Within this group, attention was given to the structure and function of coniferous forests, including old-growth forests along the Pacific Coast. Many reports and publications resulted from these efforts, including some on arthropods (*e.g.*, Deyrup, 1975; Mispagel and Rose, 1978). As investigations proceeded, the recognition of the role arthropods play in such ecosystems increased. Initial emphasis was more on functional group than on the species composition. As taxonomic and biological information increased, the role of some species in the systems became clarified. The variety of studies carried out provided vast numbers of specimens of many taxa that accumulated at different localities. One such site was the H. J. Andrews Experimental Forest in western Oregon.

#### THE H. J. ANDREWS ARTHROPOD COLLECTION

This collection had its origins in the International Biological Programme of the 1960s. The H. J. Andrews Experimental Forest was established by the U.S. Forest Service in 1948 and when the IBP was organized, the site became an important part of the Western Coniferous Biome program. Some of the forest ecosystem research at that time involved arthropods and the specimens from that era formed the basis for the present collection (Mispagel and Rose, 1978).

I joined the H. J. Andrews Research Group in 1976 and began to organize and build the collections with the cooperation of over 100 individuals. As the arthropod

work expanded, many additional specimens were added (Lewis and Maser, 1981; Anderson *et al.*, 1982; Lightfoot, 1986). Emphasis was placed on aquatic taxa, the insects associated with different plant species, and extensive collections from the litter and soil habitats (Moldenke and Fichter, 1988; Lattin and Moldenke, 1990; McIver *et al.*, 1990; Moldenke and Lattin, 1990*a, b*). Canopy studies were conducted 70 m overhead and resulted in a surprising number of species (Voegtlin, 1982; Moldenke *et al.*, 1987; Schowalter, 1989, 1990; Schowalter *et al.*, 1986). There were studies of the fauna of early successional trees as well (Schowalter *et al.*, 1986). The role of arthropods in the long-term decomposition of wood received special attention and many species resulted from these studies (Deyrup, 1975; Carpenter *et al.*, 1988; Moldenke and Fichter, 1988; Schowalter *et al.*, 1992). After a number of draft editions, the annotated list of over 3,400 species from the Andrews Forest was published (Parsons *et al.*, 1991). This document, combined with many other papers and reports, forms the basis for our present knowledge. We owe a debt of gratitude to the many people who contributed to that volume.

During the completion of the annotated list of arthropods for the H. J. Andrews Forest, many interesting details emerged. A few of these are cited below.

- Although they are considered quite mesic forests, a small, but distinct xeric arthropod fauna is present. More common are warm-dry adapted species found chiefly to the south, less common are the cold-dry adapted species whose distribution is northern. Monitoring the populations of warm-dry species should be of value in detecting response to Global Climate Change (Table 1).
- A rich and diverse litter/soil arthropod fauna, regularly containing 250 species per m<sup>2</sup>. This fauna plays an important role in nutrient cycling (Moldenke, 1990).
- A very distinct fauna of flightless species, chiefly beetles but including some of the true bugs. These are species of low vagility and certain to be impacted by forest fragmentation (Lattin, 1990) (Table 1).

- A substantial number of arthropods associated with the abundant coarse woody debris (Schowalter *et al.*, 1992). New (1984), Warren and Key (1991), and Peterken (1992) indicated that some elements of this fauna are entirely dependent upon adequate amounts of large, old wood and are likely targets for conservation (Table 1).
- A small but distinct number of non-indigenous species (56 of 3,400) on the forest. This contrasts to 41 of 480 species of non-indigenous plants on the site (Table 1).
- While these old-growth forests may appear rather homogeneous from a distance, they contain a mosaic of habitats. Approximately half of the species of butterflies known to occur in Oregon are found on the H.J.A. For the true bugs (Hemiptera: Heteroptera), 206 species out of 659 are found there and 134 genera of the 260 found in the state.

#### CONSERVATION OF ARTHROPODS OF OLD-GROWTH FORESTS

Our knowledge of arthropod diversity in old-growth forests is limited even though we know such information is highly desirable and essential if we are to develop conservation strategies. So few detailed studies have been made at different localities that we are forced to extrapolate from the very few sites where we have some knowledge. Additional studies are urgently needed while some undisturbed forests remain (Morrisson, 1988; Lattin and Moldenke, 1992).

#### *The Problem*

Much of our specific knowledge about the arthropods of old-growth forests comes from the information gathered on the H. J. Andrews Experimental Forest in western Oregon (Mispagel and Rose, 1978; Asquith *et al.*, 1990; McIver *et al.*, 1990; Lattin and Moldenke, 1990; Moldenke and Lattin, 1990 *a, b*; Parsons *et al.*, 1991) where perhaps 50–60 per cent of the fauna is known. There is, of course, a considerable literature on taxa found in forests (*e.g.*, Prentice, 1962; Furniss and Carolin, 1977; Danks, 1979; Bright, 1987; Danks and Footitt, 1989) but

most such information is not site-specific enough to know whether it applies to old-growth forests. Since it is unrealistic to assume that there will be massive efforts to acquire such information for all taxa, it seems more reasonable to identify representatives of key groups that belong to different functional guilds or occur in habitats unique to these forests (*e.g.*, coarse woody debris) for study, collection, and sampling (Goldsmith, 1991). Some of the important terrestrial functional groups include: pollinators, foliage feeders, xylophages, litter and fungal comminutors, root feeders, predators, and parasitoids. There are appropriate aquatic counter groups. Some examples of proposed efforts follow:

#### *Arthropod diversity and forest health*

A national program has been established to monitor the health of forests under the direction of the United States Forest Service and in cooperation with the Environmental Protection Agency. The goals of the Forest Health Monitoring Program are “to detect changes and trends in forest conditions and to report and interpret these changes at a multistate level.” Fourteen states have or are developing forest health monitoring programs. A plan for Oregon is being developed while that for California is nearing completion. This nation-wide program is superimposed upon the EPA-EMAP grid established several years ago. Approximately 4,500 of the 12,600 plots established are considered forested. While pest species will receive special attention, we feel that the inclusion of representatives of different functional groups will provide valuable information about the health of forested ecosystems. At the same time, more widespread knowledge about the distribution and abundance of forest arthropods will result, making conservation efforts more effective. We are developing sampling protocols to deal with selected taxa found in forested ecosystems (Table 2). The numbers of species and individuals of each species are high for arthropods. These very numbers create logistical problems when large-scale sampling efforts occur. Still, the fine resolution provided by these numbers makes the effort worthwhile.

TABLE 1. *Examples of old-growth forest arthropods.*


---

|                                                                  |
|------------------------------------------------------------------|
| Warm xeric insects                                               |
| Hemiptera: Heteroptera                                           |
| Berytidae: <i>Acanthophysa echinata</i> Uhler                    |
| Lygaeidae: <i>Malezonotus obrieni</i> Ashlock                    |
| <i>Thylochromus nitidulus</i> Barber                             |
| Miridae: <i>Macrotylus essigi</i> Ban Duzee                      |
| <i>Macrotylus multipunctatus</i> Van Duzee                       |
| Cold xeric insects                                               |
| Hemiptera: Heteroptera                                           |
| Scutelleridae: <i>Vanduzeeina borealis californica</i> Van Duzee |
| Tingidae: <i>Acalypta lillianus</i> Torre-Bueno                  |
| Flightless insects                                               |
| Orthoptera                                                       |
| Acrididae: <i>Boonacris alticola</i> Rehn and Randall            |
| Gryllacrididae: <i>Pristoceutophilus</i> spp.                    |
| <i>Tropidischia xanthostoma</i> (Scudder)                        |
| Hemiptera: Heteroptera                                           |
| Lygaeidae: <i>Plinthisus longisetosus</i> Barber                 |
| Tingidae: <i>Acalypta saundersi</i> (Downes)                     |
| Coleoptera                                                       |
| Carabidae: <i>Cychrus tuberculatus</i> Harris                    |
| <i>Metrius contractus</i> Eschscholtz                            |
| <i>Promecognathus laevisissimus</i> Dejean                       |
| <i>Zacotus matthewsi</i> LeConte                                 |
| Cicindelidae: <i>Omus dejeani</i> Reiche                         |
| Curculionidae: <i>Lobosoma horridum</i> Mannerheim               |
| Mecoptera                                                        |
| Boreidae: <i>Boreus</i> sp.                                      |
| Diptera                                                          |
| Tipulidae: <i>Chionea</i> sp.                                    |
| Coarse woody debris arthropods                                   |
| Isopoda                                                          |
| Ligidiidae: <i>Ligidium gracile</i> Dang                         |
| Insecta                                                          |
| Isoptera                                                         |
| Hodotermitidae: <i>Zootermopsis angusticollis</i> (Hagen)        |
| Coleoptera                                                       |
| Buprestidae: <i>Buprestis aurulenta</i> Linnaeus                 |
| Cerambycidae: <i>Leptura obliterated</i> Haldeman                |
| Lucanidae: <i>Playcerus oregonensis</i> Westwood                 |
| Platypodidae: <i>Platypus wilsoni</i> Swaine                     |
| Scolytidae: <i>Dendroctonus pseudotsugae</i> Hopkins             |
| Trogositidae: <i>Ostoma ferruginea</i> (Linnaeus)                |
| Hymenoptera                                                      |
| Formidicae: <i>Camponotus</i> spp.                               |
| Siricidae: <i>Urocerus albicornis</i> (Fabricius)                |
| Diptera                                                          |
| Xylophagidae: <i>Xylophagus cinctus</i> DeGeer                   |
| Non-indigenous insects                                           |
| Hemiptera: Heteroptera                                           |
| Lygaeidae: <i>Megalonotus sabulicolus</i> (Thomson)              |
| <i>Stygnocoris sabulosus</i> (Schilling)                         |
| Miridae: <i>Megaloceroea recticornis</i> (Geoffroy)              |
| <i>Stenotus binotatus</i> (Fabricius)                            |

---

TABLE 1. *Continued.*

|                                                      |
|------------------------------------------------------|
| Coleoptera                                           |
| Curculionidae: <i>Otiorhynchus ovatus</i> (Linnaeus) |
| <i>Otiorhynchus sulcatus</i> (Fabricius)             |
| <i>Sitona lineatus</i> (Linnaeus)                    |
| Scarabaeidae: <i>Aphodius fossor</i> Linnaeus        |

*The National Park Service:  
Inventory and monitoring plan*

While not directed at forests alone, the National Park Service is initiating an inventory and monitoring program (Rugh and Patterson, 1992). This effort is in response to a 1988 Management Policy directive to "assemble baseline inventory data describing the natural resources under its stewardship and will monitor those resources . . . to detect or predict changes." These efforts will generate information of value to invertebrate conservation provided they are included in such efforts. We are working to see that indeed they are included. Stolhgren

(1992) has reviewed the state of inventories in southwestern U.S. National Parks and included both aquatic and terrestrial invertebrates. The present level of knowledge about the invertebrates was quite low. We initiated a similar idea with Acadia National Park a few years ago and it now appears it may become a reality.

*Northern spotted owl conservation*

There have been extensive investigations on the northern spotted owl as an indicator of old-growth forests. The threatened status of the bird throughout much of its range has resulted in the proposal to establish Habitat

TABLE 2. *Examples of arthropod taxa for monitoring with functional roles and sampling methods.*

| Organism                   | Functional role                          | Sampling method                                 |
|----------------------------|------------------------------------------|-------------------------------------------------|
| Acarina                    |                                          |                                                 |
| Oribatid mites             | fungal, litter<br>feeders, predators     | high-gradient<br>extractors                     |
| Diplopoda                  |                                          |                                                 |
| Millipedes                 | litter communitors                       | pit-fall traps                                  |
| Collembola                 |                                          |                                                 |
| Springtails                | litter/soil<br>organic matter<br>feeders | Berlese funnels,<br>high-gradient<br>extractors |
| Insecta                    |                                          |                                                 |
| Hemiptera: Heteroptera     |                                          |                                                 |
| Seed bugs (Lygaeidae)      | seed feeders<br>on ground                | pit-fall traps                                  |
| Plant bugs (Miridae)       | foliage feeders,<br>predators            | beating foliage                                 |
| Coleoptera                 |                                          |                                                 |
| Ground beetles (Carabidae) | Predators,<br>seed feeders               | pit-fall traps                                  |
| Bark beetles (Scolytidae)  | xylophagous                              | pheromone,<br>intercept traps                   |
| Hymenoptera                |                                          |                                                 |
| Sawflies (Symphyta)        | foliage feeders                          | malaise traps                                   |
| Lepidoptera                |                                          |                                                 |
| Caterpillars               | foliage feeders                          | beating, branch<br>clipping                     |
| Adults                     | nectar feeders                           | blacklight traps                                |

Conservation Areas (HCAs) for its conservation. We have provided information on potentially sensitive arthropod species likely to benefit from the establishment of these HCAs (Lattin and Moldenke, 1992) (Table 3). As mentioned several times, these recommendations represented extrapolation from information from the H. J. Andrews Experimental Forest. We will feel more comfortable when sources from other localities are available.

*The Ministry of Forestry,  
British Columbia*

We supplied information to the Ministry of Forestry, Province of British Columbia on selected species of arthropods that are likely to be of conservation value (Lattin and Moldenke, 1992) (Table 3). This was in response to a request for information that could be considered in decisions about the types of forests for inclusion in a series of old-growth reserves. Naturally, field work will be required to even determine the presence of such species on the proposed reserve. This request is similar to others which we have received to extrapolate our site-specific information to other localities.

*Conservation of Pacific Yew  
(Taxus brevifolia)*

I am completing a monograph on the arthropods associated with *Taxus* throughout the world, including the Pacific Yew, *Taxus brevifolia*. The great interest in *Taxus* species as a source of taxol, a cancer drug, has vaulted this obscure understory tree into international prominence. Virtually nothing was known about arthropods on any species of *Taxus* except on those species widely used as ornamentals, chiefly *Taxus baccata* and *T. cuspidata*. Conservation efforts for *Taxus brevifolia* naturally will benefit the few associated arthropods found on it. The threat to the tree, and perhaps to its arthropod fauna, is likely to be greatest from non-indigenous arthropod species moving into natural stands from cultivars. The establishment of yew plantations for the production of foliage and stems for taxol production may create populations of arthropods able to move out into undisturbed forested ecosystems as well. Thus,

the location of such plantations should be selected with care.

*Importation of raw logs*

The decline in the availability of logs for mills in the west has increased the interest in importing raw logs from other countries. It has not stopped the export of raw logs from our region, however. Over the past two years, there has been intense interest in bringing in raw logs from Siberia, New Zealand, and Chile (Anonymous, 1991, 1992). The present lack of adequate quarantine regulations for large-scale log importations has intensified the efforts to bring in such material. Only now are comprehensive regulations under public review that will provide some protection against the unintentional introduction of insects and pathogens. The risks are very high. This has been documented extensively for the Siberian logs (Anon., 1991), less so for New Zealand logs (Anon., 1992) and is presently underway for Chilean log importation. While this is not *directly* related to conservation, one has only to look at Hawaii to see what impact non-indigenous species have had upon the local biota of all types. One should examine, too, the forests of northeastern North America to see the damage that has occurred from only a few diseases and insects, a forest changed forever. In spite of statements to the contrary, the large-scale importation of raw logs without absolute certainty of pest-free logs poses an enormous risk to the forests of the west and to the native arthropods living in them.

THE FUTURE

Many activities will influence the successful conservation of arthropods in old-growth forests, not the least of which will be the achievement of a balance between forest harvest and conservation. This balance is a highly politicized topic that became an issue in the 1992 presidential campaign. A "forest summit" is planned for 1993 to try to resolve the conflicts. A major goal is to agree upon a level of sustainable harvest. Such action will create the template for any effort in forest arthropod conservation (Southwood, 1977; New, 1984; Wilcove *et al.*, 1986; Warren and Key, 1991; Peterken,

TABLE 3. *Examples of old-growth arthropods of conservation value.*

| Organism                                           | References |
|----------------------------------------------------|------------|
| Diplopoda                                          |            |
| Xestodermidae:                                     |            |
| <i>Harpaphe haydeniana haydeniana</i> (Wood)       | 1          |
| Insecta                                            |            |
| Orthoptera                                         |            |
| Acrididae:                                         |            |
| <i>Boonacris alticola</i> Rehn and Randall         | 1, 2, 3    |
| Gryllacrididae:                                    |            |
| <i>Pristoceutophilus celatus</i> (Scudder)         | 1, 2, 3    |
| <i>Pristoceutophilus cercalis</i> Caudell          | 1, 2, 3    |
| <i>Pristoceutophilus sargentae</i> Gurney          | 1, 2, 3    |
| <i>Tropidischia xanthostoma</i> (Scudder)          | 1, 2, 3    |
| Hemiptera: Heteroptera                             |            |
| Enicocephalidae:                                   |            |
| <i>Boreostolus americanus</i> Wygodzinsky and Stys | 1, 2       |
| Lygaeidae:                                         |            |
| <i>Plinthinus longisetosus</i> Barber              | 1, 2       |
| <i>Thylochromus nitidulus</i> Barber               | 1, 2       |
| Miridae:                                           |            |
| <i>Phytocoris nobilis</i> Stonedahl                | 1, 2       |
| <i>Pithanus maerkeli</i> (Herrich-Schaeffer)       | 1, 2       |
| <i>Polymerus castilleja</i> Schwartz               | 1, 2       |
| Scutelleridae:                                     |            |
| <i>Vanduzeeina borealis californica</i> Van Duzee  | 1, 2       |
| Tingidae:                                          |            |
| <i>Acalypta lillianus</i> Torre-Bueno              | 1, 2       |
| <i>Acalypta saundersi</i> (Downes)                 | 1, 2       |
| Coleoptera                                         |            |
| Carabidae:                                         |            |
| <i>Cychrus tuberculatus</i> Harris                 | 1, 2       |
| <i>Metrius contractus</i> Eschscholtz              | 1, 2       |
| <i>Promecognathus laevissimus</i> DeJean           | 1, 2       |
| <i>Zacotus matthewsi</i> LeConte                   | 1, 2       |
| Cicindelidae:                                      |            |
| <i>Omus dejeani</i> Reiche                         | 1, 2       |
| Curculionidae:                                     |            |
| <i>Lobosoma horridum</i> Mannerheim                | 1, 2       |

For other details see references, viz., 1: Parsons *et al.*, 1991; 2: Lattin and Moldenke, 1992; 3: Lightfoot, 1986.

1992; Pimentel *et al.*, 1992), especially on public land.

Effective arthropod conservation in old-growth forest will require better knowledge of (1) the fauna, (2) species distribution throughout the region, (3) habitat requirements, (4) ecological functions of at least the key taxa, (5) the community structure and dynamics of the fauna, (6) the impact of different disturbance regimes upon the special habitats and the associated fauna, (7) appropriate and adequate sampling and monitoring protocols, (8) and an adequate systematic knowledge base of the appropri-

ate taxa in order to allow intelligent decisions to be made (Wilson, 1985, 1989).

#### ACKNOWLEDGMENTS

My thanks to the many people who contributed to our knowledge of the arthropods of old-growth forests. What we know today reflects their collected efforts. Thanks are due to the members of the H. J. Andrews Research Group who educated me in the complexities of forest ecosystems. J. F. Franklin, University of Washington, has been a constant source of knowledge, inspiration, and encouragement. D. A. Crossley,



Jr., University of Georgia, encouraged me in the early days when the tasks seemed impossible. Thanks to Gary L. Parsons, Gerassimos Cassis, Andrew R. Moldenke, Norman H. Anderson, Jeffrey C. Miller, Paul Hammond, Timothy D. Schowalter, Bonnie Hall, Martha Brookes, and Frederick J. Swanson for their efforts to see the annotated checklist of the H. J. Andrews Experimental Forest through to completion. Andrew R. Moldenke deserves my special thanks for his extensive efforts to clarify the role of arthropods in forested ecosystems. Our many discussions over the years have provided me with inspiration and knowledge on many topics. My thanks to Anne Christie, Kerr Library, for help with critical literature and to Deanna Watkins for help in the preparation of the manuscript. The valuable comments from two anonymous reviewers are gratefully acknowledged.

Support for this work from NSF grants DEB-80-12122, BSR-85-14325, BSR-85-16590, BSR-87-17434, and BSR-90-11663, is gratefully acknowledged.

#### REFERENCES

- Anderson, N. H., G. M. Cooper, and D. G. Denning. 1982. Invertebrates of the H. J. Andrews Experimental Forest, western Cascades, Oregon. 2: An annotated checklist of caddisflies (Trichoptera). U.S. Dep. Agric., For. Serv., Pacif. Northwest For. Range Exp. Stn., Res. Note. PNW-402.
- Anonymous. 1991. Pest risk assessment of the importation of larch from Siberia and Soviet Far East. U.S. Dep. Agric., For. Serv., Misc. Publ. No. 1495.
- Anonymous. 1992. Pest risk assessment of the importation of *Pinus radiata* and Douglas-fir logs from New Zealand. U.S. Dep. Agric., For. Serv., Misc. Publ. No. 1508.
- Asquith, A., J. D. Lattin, and A. R. Moldenke. 1990. Arthropods: The invisible diversity. *Northwest Environ. J.* 6:404-405.
- Bright, D. E. 1987. The insects and arachnids of Canada. Part 15. The metallic wood-boring beetles of Canada and Alaska. Coleoptera: Buprestidae. Agriculture Canada, Research Branch. Publ. 1810.
- Carpenter, S. E., M. E. Harmon, E. R. Ingham, R. G. Kelsey, J. D. Lattin, and T. D. Schowalter. 1988. Early patterns of heterotroph activity in conifer logs. *Proc. Royal Soc. Edinburgh* 94B:33-43.
- Danks, H. V. (ed.) 1979. Canada and its insect fauna. *Mem. Ent. Soc. Can.* 108.
- Danks, H. V. and R. G. Foottit. 1989. Insects of the boreal zone of Canada. *Can. Ent.* 121:625-690.
- Deyrup, M. A. 1975. The insect community of dead and dying Douglas-fir. 1. The Hymenoptera. Univ. Washington, Seattle. Coniferous Forest Biome Bull. 6.
- Franklin, J. F. and C. T. Dyrness. 1971. A checklist of vascular plants on the H. J. Andrews Experimental Forest, western Oregon. U.S. Dep. Agric., For. Serv., Pacif. Northwest For. Range Exp. Stn., PNW-138.
- Franklin, J. F. and C. T. Dyrness. 1973. Natural vegetation of Oregon and Washington. U.S. Dep. Agric., For. Serv., Pacif. Northwest For. Range Exp. Stn., Gen. Tech. Rep., PNW-8.
- Furniss, R. L. and V. M. Carolin. 1977. Western forest insects. U.S. Dep. Agric., For. Serv., Misc. Publ. 1339.
- Goldsmith, F. B. 1991. *Monitoring for conservation and ecology*. Chapman and Hall, London.
- Harmon, M. E. 1992. Long-term experiments on log decomposition at the H. J. Andrews Experimental Forest. U.S. Dep. Agric., For. Serv., Pacif. Northwest For. Range Exp. Stn., Gen. Tech. Rep., PNW-GTR-280.
- Harmon, M. E., W. K. Ferrell, and J. F. Franklin. 1990. Effects on carbon storage of conversion of old-growth forests to young forests. *Science* 247: 699-702.
- Harmon, M. E., J. F. Franklin, F. J. Swanson, P. Sollins, S. V. Gregory, J. D. Lattin, N. H. Anderson, S. P. Cline, N. G. Aumen, J. R. Sedell, G. W. Lienkaemper, K. Cromack, Jr., and K. W. Cummins. 1986. Ecology of coarse woody debris in temperate ecosystems. *Adv. Ecol. Res.* 15:133-302.
- Hatch, M. H. 1949. *A century of entomology in the Pacific Northwest*. Univ. Washington Press, Seattle.
- Keen, F. P. 1952. Insect enemies of western forests. U.S. Dep. Agric., For. Serv., Misc. Publ. 273.
- Lattin, J. D. 1990. Arthropod diversity in Northwest old-growth forests. *Wings* 15(2):7-10.
- Lattin, J. D. and A. R. Moldenke. 1990. Moss lacebugs in Northwest conifer forests: Adaptation to long-term stability. *Northwest Environ. J.* 6:406-407.
- Lattin, J. D. and A. R. Moldenke. 1992. Ecologically sensitive invertebrate taxa of Pacific Northwest old-growth conifer forests. Report prepared for the Northern Spotted Owl Recovery Team, Other Species and Ecosystems Committee, Corvallis, Oregon.
- Lawton, J. H. 1983. Plant architecture and the diversity of phytophagous insects. *Ann. Rev. Ent.* 28: 23-39.
- Lewis, R. E. and C. Maser. 1981. Invertebrates of the H. J. Andrews Experimental Forest, western Cascades, Oregon. 1. An annotated checklist of fleas. U.S. Dep. Agric., For. Serv., Pacif. Northwest For. Range Exp. Stn., Res. Note PNW-378.
- Lightfoot, D. C. 1986. Invertebrates of the H. J. Andrews Experimental Forest, western Cascades, Oregon. 3: The Orthoptera (grasshoppers and crickets). U.S. Dep. Agric., For. Serv., Pacif. Northwest For. Range Exp. Stn., Res. Note PNW-443.
- Maser, C., R. F. Tarrant, J. M. Trappe, and J. F. Frank-

- lin (Tech. eds.). 1988. From the forest to the sea: A story of fallen trees. U.S. Dep. Agric., For. Serv., Pacif. Northwest For. Range Exp. Stn., Gen. Tech. Rep. PNW-GTR-229.
- Maser, C. and J. M. Trappe (Tech. eds.). 1984. The seen and unseen world of the fallen tree. U.S. Dep. Agric., For. Serv., Pacif. Northwest For. Range Exp. Stn., Gen. Tech. Rep. PNW-164.
- McIver, J. D., A. R. Moldenke, and G. L. Parsons. 1990. Litter spiders as bio-indicators of recovery after clearcutting in a western coniferous forest. *Northwest Environ. J.* 6:410–412.
- Mispagel, M. E. and S. D. Rose. 1978. Arthropods associated with various age stands of Douglas-fir from foliar, ground, and aerial strata. Univ. Washington, Seattle. *Coniferous Forest Biome Bull.* 13.
- Moldenke, A. R. 1990. One hundred twenty thousand little legs. *Wings* 15(2):11–14.
- Moldenke, A. R. and B. L. Fichter. 1988. Invertebrates of the H. J. Andrews Experimental Forest, western Cascade Mountains, Oregon: IV. The Oribatid mites (Acari: Cryptostigmata). U.S. Dep. Agric., For. Serv., Pacif. Northwest For. Range Exp. Stn., Gen. Tech. Rep. PNW-GTR 217.
- Moldenke, A. R., B. L. Fichter, W. P. Stephen, and C. E. Griswold. 1987. A key to the arboreal spiders of Douglas-fir and true fir forests of the Pacific Northwest. U.S. Dep. Agric., For. Serv., Pacif. Northwest For. Range Exp. Stn., Gen. Tech. Rep. PNW-GTR 207.
- Moldenke, A. R. and J. D. Lattin. 1990a. Dispersal characteristics of old-growth soil arthropods: The potential for loss of diversity and biological function. *Northwest Environ. J.* 6:408–409.
- Moldenke, A. R. and J. D. Lattin. 1990b. Density and diversity of soil arthropods as “biological probes” of complex soil phenomena. *Northwest Environ. J.* 6:409–410.
- Morrison, P. H. 1988. Old-growth in the Pacific Northwest: A status report. Wilderness Soc., Washington, D.C.
- New, T. R. 1984. Insect conservation—an Australian perspective. W. Junk, Dordrecht. 184 pp.
- Parsons, G. L., G. Cassis, A. R. Moldenke, J. D. Lattin, N. H. Anderson, J. C. Miller, P. Hammond, and T. D. Schowalter. 1991. Invertebrates of the H. J. Andrews Experimental Forest, western Cascade Range, Oregon: V. An annotated list of insects and other arthropods. U.S. Dep. Agric., For. Serv., Pacif. Northwest For. Range Exp. Stn., Gen. Tech. Rep. PNW-GTR 290.
- Peterken, G. F. 1992. Conservation of old-growth: A European perspective. *Nat. Areas J.* 12(1):10–19.
- Pimentel, D., V. Strachow, D. A. Takacs, H. W. Brubaker, A. R. Dumas, J. J. Meaney, J. A. S. O’Neal, D. E. Onsi, and D. B. Corzilius. 1992. Conserving biological diversity in agricultural/forestry systems. *BioScience* 42:354–362.
- Prentice, R. M. (co-ordinator). 1962. Forest Lepidoptera of Canada. Vol. 2. Nyctolidae, Notodontidae, Noctuidae, Liparidae. Canada Dep. For., For. Ent. Path. Branch. 75–281.
- Rugh, J. C. and D. L. Peterson. 1992. Inventory and monitoring in the National Parks: Forging a plan. *Park Sci.* 12(4):1,3–4.
- Schowalter, T. D. 1989. Canopy arthropod community structure and herbivory in old-growth and regenerating forests in western Oregon. *Can. J. For. Res.* 19:318–322.
- Schowalter, T. D. 1990. Invertebrate diversity in old-growth versus regenerating forest canopies. *Northwest Environ. J.* 6:403–404.
- Schowalter, T. D., B. A. Caldwell, S. E. Carpenter, R. P. Griffiths, M. E. Harmon, E. R. Ingham, R. G. Kelsey, J. D. Lattin, and A. R. Moldenke. 1992. Decomposition of fallen trees: Effects of initial conditions and heterotroph colonization rates. In K. P. Singh and J. S. Singh (eds.), *Tropical ecosystems: Ecology and management*, pp. 373–383. Wiley East., New Delhi.
- Schowalter, T. D., S. G. Stafford, R. E. Slagle. 1986. Arboreal arthropod community structure in an early successional coniferous forest ecosystem in western Oregon. *Great Basin Nat.* 48:321–333.
- Southwood, T. R. E. 1977. Habitat, the template for ecological strategies? *J. Anim. Ecol.* 46:337–365.
- Southwood, T. R. E., V. K. Brown, and P. M. Reader. 1979. The relationships of plant and insect diversities in succession. *Biol. J. Linnean Soc.* 12:327–348.
- Stanton, N. L. and J. D. Lattin. 1989. In defense of species. *BioScience* 30:67.
- Stohlgren, T. J. 1992. An assessment of biotic inventories in western U.S. National Parks. *Nat. Areas J.* 12:145–153.
- Voegtlin, D. J. 1982. Invertebrates of the H. J. Andrews Experimental Forest, western Cascade Mountains, Oregon: A survey of arthropods associated with the canopy of old-growth *Pseudotsuga menziesii*. Oregon St. Univ., For. Res. Lab., Spec. Publ. 4.
- Walsingham, Thomas (Lord). 1880. *Pterophoridae of California and Oregon*. John van Voorst, London.
- Waring, R. H. and J. F. Franklin. 1979. Evergreen coniferous forests of the Pacific Northwest. *Science* 204:1380–1386.
- Warren, M. S. and R. S. Key. 1991. Woodlands: Past, present, and potential for insects. In N. M. Collins and J. A. Thomas (eds.), *The conservation of insects and their habitats*, pp. 155–211. Academic Press, London.
- Wilcove, D. S., C. M. McLellan, and A. P. Dobson. 1986. Habitat fragmentation in the temperate zone. In M. E. Soulé (ed.), *Conservation biology: The science of scarcity and diversity*, pp. 237–256. Sinauer, Massachusetts.
- Wilson, E. O. 1985. The biological diversity crisis: A challenge to science. *Issues Sci. Technol.* 2:20–29.
- Wilson, E. O. 1989. The coming pluralization of biology and the stewardship of systematics. *BioScience* 39:242–245.
